# Supplementary material
Source: PubMed Central journal article supplement (PMC3342426)

On-line Supplemental Material: Figure 2 Results without Latent Class Pattern Mixture Modeling  
 Trajectories of Predictors of Behavior Problems that are Primarily Internal to Youth

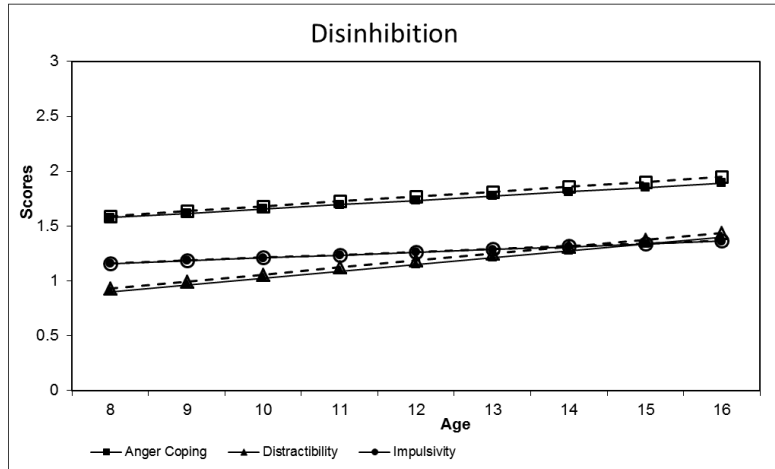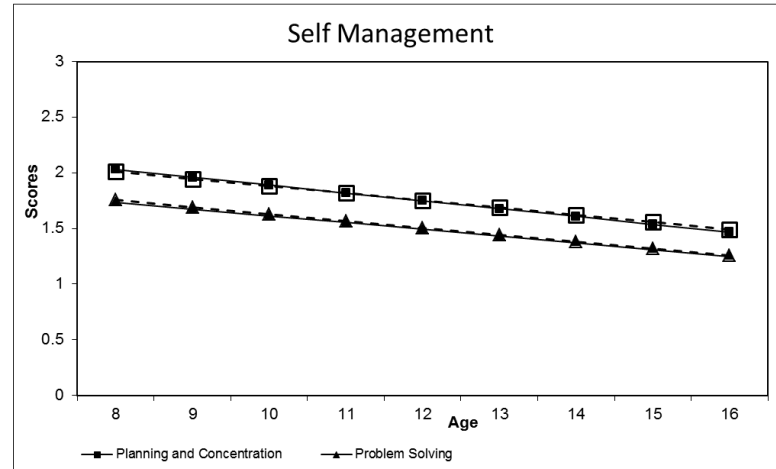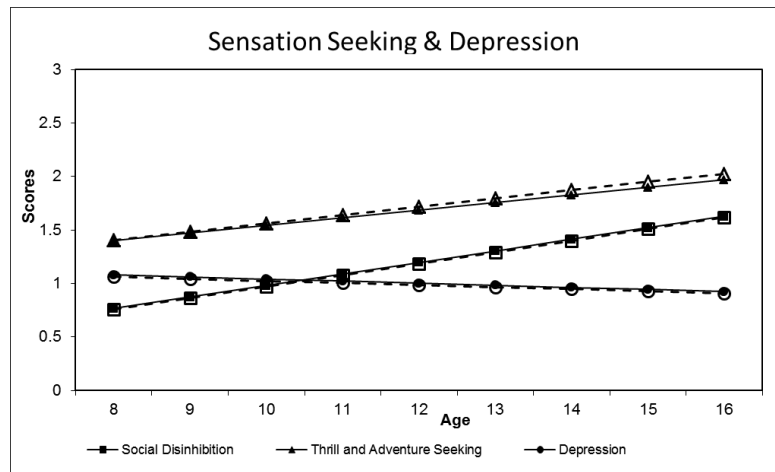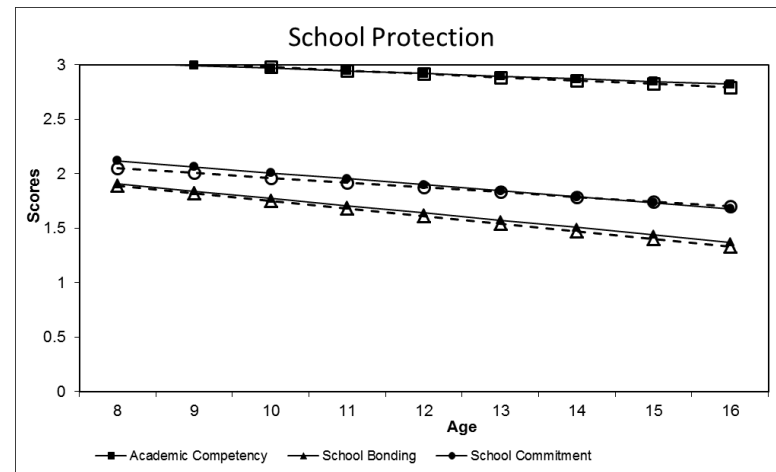

Note: Solid lines represent results for the subsample having three or more observations (n=330). Corresponding shapes that are hollow and their dashed lines present results for the entire sample (N=1,147).

On-line Supplemental Material: Figure 2 (cont.)

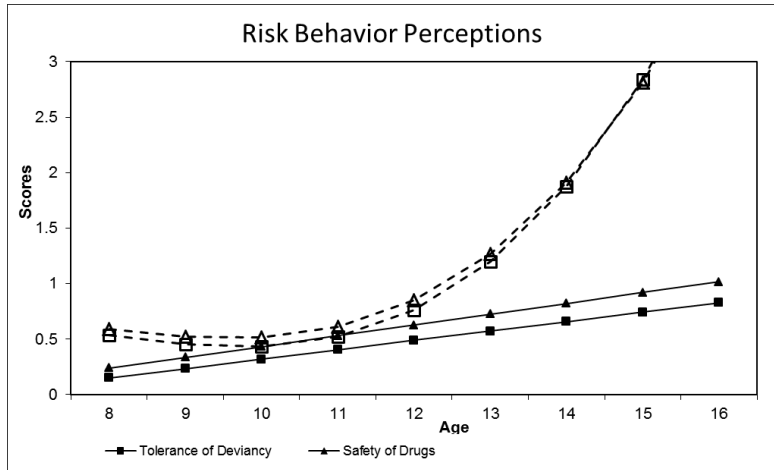

On-line Supplemental Material: Figure 3 Results without Latent Class Pattern Mixture Modeling  
 Trajectories of Predictors of Behavior Problems that are Primarily External to Youth

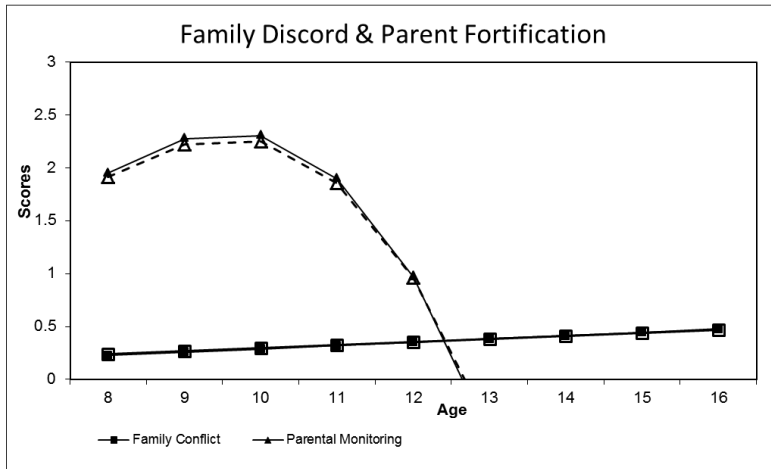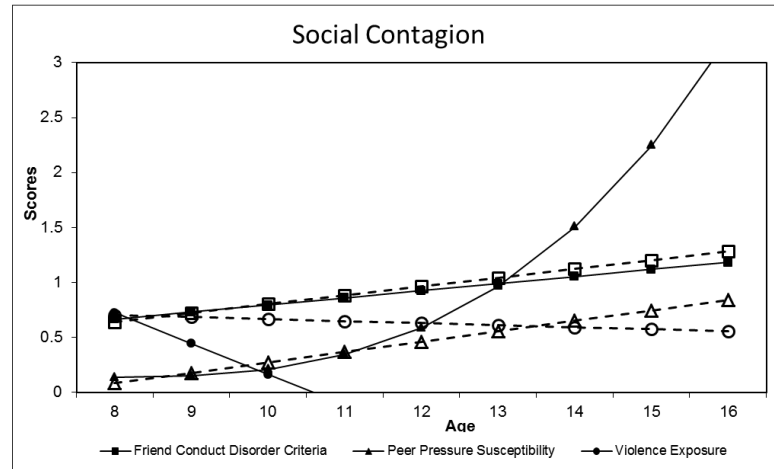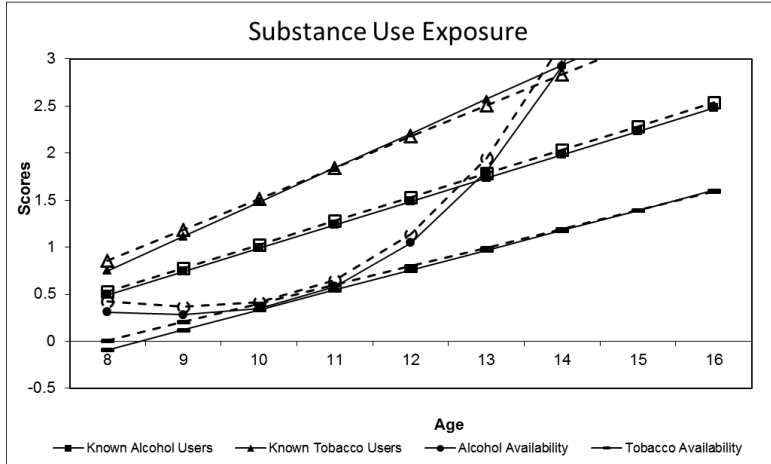

Supplement: NIHMS351736-supplement-01.pdf [file NIHMS351736-supplement-01.pdf]
